# Supplementary material for: Neutralizing Epitopes and Residues Mediating the Potential Antigenic Drift of the Hemagglutinin-Esterase Protein of Influenza C Virus
Source: MDPI journal article supplement (doi:10.3390/v10080417), 2018-08-09
Supplement: s1 [file s1]

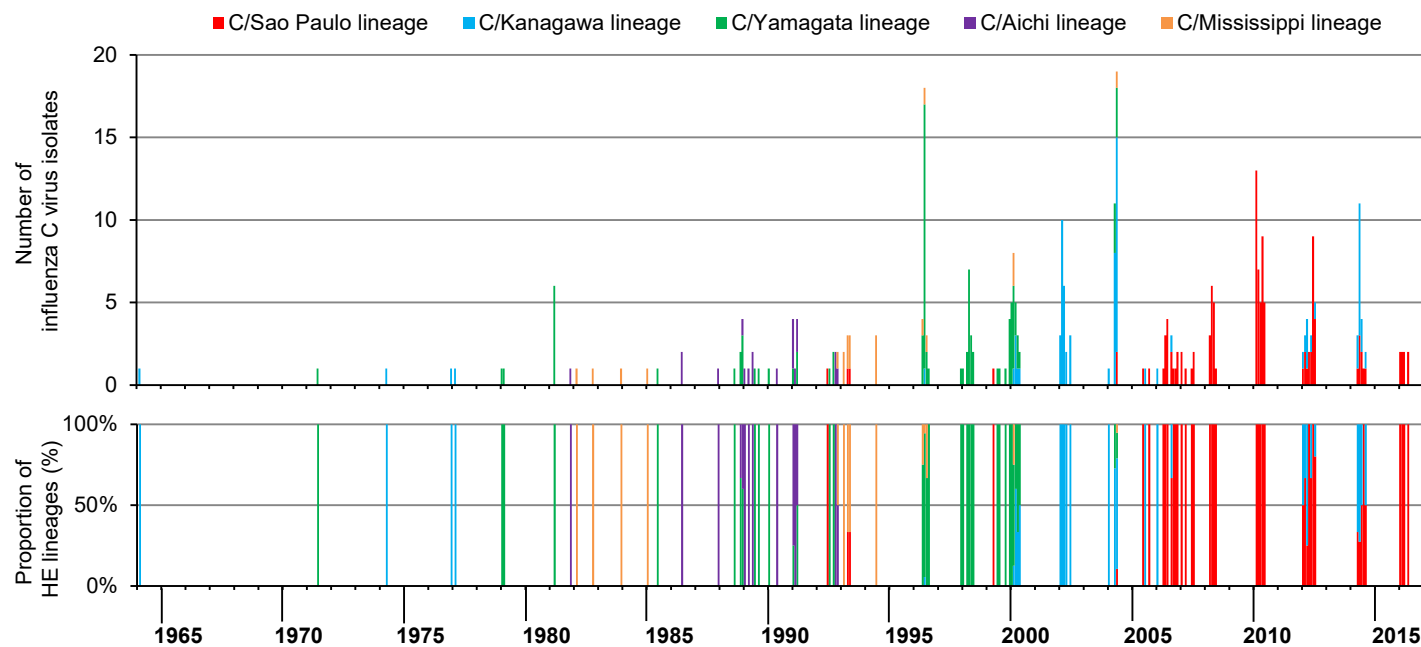

**Figure S1:** Monthly distribution of influenza C viruses in Japan between 1964 and 2016.

The number of influenza C virus isolates was obtained from our previous reports: Matsuzaki et al. [10-12,19,30,31], Kimura et al. [5], Tanaka, et al [20], Kawamura et al. [22], Adachi et al. [28], and Ohyama et al. [29].
